# Supplementary material for: Modelling the processes driving Trichodesmium sp. spatialdistribution and biogeochemical impact in the tropical PacificOcean
Source: Copernicus journal article supplement (doi:10.5194/bg-2017-559), 2018-01-15
Supplement: Supplementary file [file bg-2017-559-AC1-supplement.pdf]

**Interactive comment on “Modelling the processes driving *Trichodesmium* sp. spatial distribution and biogeochemical impact in the tropical Pacific Ocean” by Cyril Dutheil et al.**

**Anonymous Referee #1**

Received and published: 8 March 2018

**General comments :** The main goal of this study is to model the processes driving the spatial distribution of *Trichodesmium* N<sub>2</sub>-fixer in the tropical Pacific Ocean in order to better understand their biogeochemical impact in this oceanic basin. The modelling tool used to achieve this goal is a 3D coupled dynamical-biogeochemical model applied in condition of long-time simulation (20 y). The main innovative point of this study is to develop and validate from field data an explicit formulation of N<sub>2</sub> fixation process associated to a *Trichodesmium* compartment. This formulation is related to the iron intracellular quota in a sophisticated way. In such a configuration the coupled model is able to reproduce, at spatial large scale, the main physical and biogeochemical patterns observed in the dedicated dataset. The assessment of seasonal cycles as that of N<sub>2</sub> fixation rates is less efficient by the model, may be owing to the use of a climatological physical forcing and spatial low resolution of physical model. At the end of this study, a set of sensitivity tests is presented (i) to check the added value arising from an explicit formulation of the N<sub>2</sub> fixation process in the coupled model and (ii) to assess the potential roles of iron fluxes from island sediments on the spatial distributions and biomasses of *Trichodesmium* in the WTSP. On the whole these sensitivity tests are interesting because they enable to increase our knowledge on the biogeochemical roles of *Trichodesmium* in the tropical Pacific Ocean and can suggest interesting goals for future field cruises. While this paper is of significant scientific interest, it appears uneven in its writing and its quality. Some sections as introduction, discussion and conclusion are clear and well-written, other ones (i.e. methods, results and appendix especially) show many unclear points or they lack of information crucial to a clear understanding. Therefore, I recommend this manuscript for a publication in BG only following major revisions and thorough answers to my requests. Hereafter I give a set of comments, which will somewhat help Authors to improve their manuscript.

**Legend for the review :**

In yellow the major comments

In blue our answers

**Response to general comments:**

To answer to your comments we have completely rewritten the method and appendix section. The result section has also been reworked so that the speech is clearer and more precise. We have also strengthened the introduction by more accurately detailing the state of the art of nitrogen fixation in biogeochemical models.

### **Specific comments :**

#### **1. Title**

The second part of the title does not really make sense. The biogeochemical impact of what on what exactly? Thus I suggest a slight change on this title as for example ‘and the biogeochemical impact of N<sub>2</sub> fixation on primary productivity in the tropical Pacific Ocean’.

Indeed, we decided to change the title to « Modeling the *Trichodesmium* sp. related N<sub>2</sub> fixation : driving processes and impacts on primary production in the tropical Pacific Ocean. »

#### **2. Abstract**

- L24-25: I suggest replacing the word ‘compartment’ by ‘parameterization’ or ‘formulation’.

We replaced the word ‘compartment’ by ‘formulation’ (L24)

- L27: Replace the word ‘conditions’ by ‘fields’. Used in this context, the former term is ambiguous. I guess the author would rather mean ‘field data/observations’.

We replaced the word ‘conditions’ by ‘fields’ (L26)

- L34: Replace the sentence ‘. . .the spatial distribution and the abundance of. . .’ by ‘the spatial distribution of *Trichodesmium* biomasses in. . .’ Your model does not provide abundance (number of cells) of *Trichodesmium* but rather its biomass.

As suggested, we removed the reference to « abundance » and we replaced ‘... spatial distribution and abundance ...’ by ‘...spatial distribution of *Trichodesmium* biomasses...’ (L33)

#### **3. Introduction**

- L52-53: redundant reference to Zehr and Bombar (2015).

We removed the second occurrence of the reference. (L51-52)

- L57: missing word (may be ‘known’?) in ‘. . . is consequently better (Bergman et al., 2013. . .’

Indeed, the word 'known' was missing and has been added. (L56)

- L77-79: Author writes about numerical models without indicating references on these models. I

would like to see some references in the revised version of the ms.

This section has been deeply modified and includes now several references concerning both, the implicit (Bisset et al., 1999; Maier-Reimer and Kriest, 2005; Assmann et al., 2010; Aumont et al., 2015) and explicit parameterization (Moore et al., 2004; Dunne et al., 2013) of the N<sub>2</sub> fixation (L77-91).

- L103: ‘... implications for and...’

We followed the reviewer’s suggestion (L117)

On the whole, the state-of-art on how the N<sub>2</sub> fixation process is represented in marine plankton models is lacking in this introduction. Some words on this point are given at the beginning of discussion but I think this piece of text should be rather put and developed also in Introduction.

**Major point to be addressed.**

Introduction has been modified and we noticeably chose to follow the reviewer's recommendation and replaced the two sentences referring to numerical models (L119 to 121 in the submitted manuscript) by the following paragraph:

« Numerical models have also been used as they allow to overcome the scarcity of observations that may limit the implementation of the two previous approaches (Aumont et al., 2015; Bissett et al., 1999; Dutkiewicz et al., 2012; Keith Moore et al., 2006; Krishnamurthy et al., 2009; Monteiro et al., 2011; Moore et al., 2013; Tagliabue et al., 2008). They can notably be used to investigate the spatial and temporal variability of dinitrogen fixation and to study its controlling environmental factors. In these models, dinitrogen fixation has been implemented in various ways. Some models use implicit parameterizations (Bisset et al., 1999; Maier-Reimer and Kriest, 2005; Assmann et al., 2010; Aumont et al., 2015) to derive dinitrogen fixation from environmental conditions (mainly nitrate, phosphate and iron concentrations, temperature and light) without explicitly simulating any nitrogen fixing organisms. Alternatively, other models rely on explicit descriptions of diazotrophs (Moore et al., 2004; Dunne et al., 2013) from knowledge acquired on *Trichodesmium* sp during laboratory experiments sp. (Fennel et al., 2001; Hood et al., 2001; Moore et al., 2001). Noticeably, several modeling studies have been focused on the role of iron in controlling the distribution of diazotrophs and dinitrogen fixation (Keith Moore et al., 2006; Krishnamurthy et al., 2009; Moore et al., 2004; Tagliabue et al., 2008). Indeed, a realistic representation of marine iron concentrations has been stressed as a key factor to adequately simulate the habitat of diazotrophs (Monteiro et al., 2011; Dutkiewicz et al., 2012). » (L77-91).

#### 4. Methods

- L106: the terms 'primary production model' for PISCES are too restrictive. PISCES is a plankton community model. I suggest replacing 'primary production' by 'biogeochemical'.

We followed the reviewer's suggestion (L120).

-L115-127: What are exactly the initial, boundary conditions and forcing of the simulation? This point is not clear to me. Indeed, a climatological forcing strategy seems to be used while it is written in the section 2.2. that the reference simulation is launched over twenty years from 1993 to 2003 suggesting the use of realistic physical (and biogeochemical ?) forcing. No information is given on the types of biogeochemical forcing at the model boundary (e.g. atmospheric deposition of nutrients?). This point needs to be clarified. **Major point to be addressed.**

Indeed, the wording used in this section was confusing and some informations about our simulations were missing. Thus, we splitted the « Coupled dynamical (ROMS)-primary production (PISCES) model » section in a « ROMS » and « PISCES » sections. The latter will be detailed in a following point of this review while the new « ROMS » section is answering to your present comments.

##### « 2.1.1 ROMS

In this study, we used a coupled dynamical-biogeochemical framework based on the regional ocean dynamical model ROMS (Regional Oceanic Modeling System, (Shchepetkin and McWilliams, 2005)) and the state of the art biogeochemical model PISCES (Pelagic Interactions Scheme for Carbon and Ecosystem Studies). The ocean model configuration is based on the ROMS-AGRIF (Penven et al., 2006) informatic code and covers the tropical Pacific region [33°S-33°N; 110°E-90°W]. It has 41 terrain-following vertical levels with 2-5 m vertical resolution in the top 50 m of the water column, then 10-20 m resolution in the thermocline and 200-1000 m resolution in the deep ocean. The horizontal resolution is 1°. The turbulent vertical mixing parameterization is based on the non-local K profile parameterization (KPP) of (Large et al., 1994). Open boundaries conditions are treated using a mixed active/passive scheme (Marchesiello et al., 2001). This scheme is used to force our regional configuration with monthly climatological large-scale boundary conditions from a ½° ORCA global ocean simulation (details available in Kessler and Gourdeau (2007)), while allowing anomalies to radiate out of the domain. The use of similar ROMS configurations (e.g vertical resolution, mixed active/passive scheme, turbulent vertical mixing parameterization) in the WTSP is largely validated through studies demonstrating skills in simulating both the surface (Jullien et al., 2012, 2014; Marchesiello et al., 2010) and subsurface ocean circulation (Couvelard et al., 2008).

To compute the momentum and fresh water/heat fluxes, we also used a climatological forcing strategy. Indeed, documenting the inter-annual to decadal variability is beyond the scopes of our study, which justifies using climatological forcing fields. A monthly climatology of the momentum forcing is computed from the 1993-2013 period of the ERS1-2 scatterometer stress (<http://cersat.ifremer.fr/oceanography-from-space/our-domains-of-research/air-sea-interaction/ers-ami-wind>). Indeed, ERS derived forcing has been shown to produce adequate simulations of the Pacific Ocean dynamics (e.g, Cravatte et al., (2007)). A monthly climatology at 1/2° resolution computed from the Comprehensive Ocean–Atmosphere Data Set (COADS; Da Silva et al. 1994) is used for heat and fresh water forcing. In our set-up, ROMS also forces on line a biogeochemical model using a WENO5 advection scheme (i.e. five order weighted essentially non-oscillatory scheme; Shchepetkin and McWilliams, 1998). After a one year spin-up we stored 1-day averaged outputs for analysis. »

- L128-155 on the description of the PISCES model and the formulation of the N<sub>2</sub>- fixation process. This section has numerous unclear points and omissions weakening the paper as a whole. This section needs to be reworked and strengthened. **Major point to be addressed.**

Indeed, this comment is shared by the second reviewer. Therefore we decided to add specific sections, much more detailed, on the PISCES model :

#### « 2.1.2 PISCES

In this study, we used a quota version of the standard PISCES model (Aumont and Bopp, 2006a; Aumont et al., 2015), which simulates the marine biological productivity and the biogeochemical cycles of carbon and the main nutrients (P, N, Si, Fe). This modified model, called PISCES-QUOTA, is extensively described in Kwiatkowski et al. (2018, in press). Our version is essentially identical to Kwiatkowski's version that included an additional picophytoplankton group, except that this latter group has been removed here and replaced by a *Trichodesmium* compartment. Here we only highlight the main characteristics of the model and the specifics of our model version. Our version of PISCES-QUOTA has then 39 prognostic compartments. As in the standard PISCES version, phytoplankton growth is limited by the availability in five nutrients: nitrate and ammonium, phosphate, silicate and iron. Five living compartments are represented: Three phytoplankton groups corresponding to nanophytoplankton, diatoms, and *Trichodesmium* and two zooplankton size-classes that are microzooplankton and mesozooplankton. The elemental composition of phytoplankton and non-living organic matter is variable and is prognostically predicted by the model. On the other hand, zooplankton are assumed to be strictly homeostatic, i.e. their stoichiometry is kept constant (e.g., Meunier et al., 2014; Sterner & Elser, 2002). Nutrients uptake and assimilation as well as limitation of growth rate are modeled according to the chain

model of Pahlow and Oschlies (2009). The P quota limits N assimilation which in turns limits phytoplankton growth. The phosphorus to nitrogen ratios of phytoplankton are described based on the potential allocation between P-rich biosynthesis machinery, N-rich light harvesting apparatus, a nutrient uptake component, the carbon stores, and the remainder (Daines et al., 2014; Klausmeier et al., 2004). This allocation depends on the cell size and on the environmental conditions.

Nutrients are delivered to the ocean through dust deposition, river runoff and mobilization from the sediment. The atmospheric deposition of iron is derived from a climatological dust simulation (Tegen and Fung, 1995). The iron from sediment is recognized as a significant source (Johnson et al., 1999; Moore et al., 2004). This iron source is indeed parameterized in PISCES as, basically, a time-constant flux of dissolved iron ( $2 \mu\text{mol.m}^{-2}.\text{day}^{-1}$ ) applied over the whole sediment surface and modulated depending only on depth. A detailed description of this sedimentary source is presented in Aumont et al. (2015). The initial conditions and biogeochemical fluxes (iron, phosphorus, nitrate, ...) at the boundaries of our domain are extracted from the World Ocean Atlas 2009 (<https://www.nodc.noaa.gov/OC5/WOA09/woa09data.html>). »

- L137: The reference of Kwiatkowski et al. (subm.) is missing in the bibliography while it is a crucial reference to see the so-called quota version of PISCES model. On the web, this reference cannot be found. Is this paper published now?

The paper is currently in press (at the time we write this review) and reference to this paper has been added.

- L129-141. The description of the model is too succinct. Is there a term of natural mortality on *Trichodesmium*? What about the trophic interactions between zooplankton and *Trichodesmium*? Is zooplankton able to graze *Trichodesmium* or not? From the Table 1 and the parameters inside I can suppose yes but it is not clearly stated and discussed in this section. The two types of zooplankton seem to be able to graze *Trichodesmium*. No argument is given for this choice. I would like to see a text around this point in the revised ms. **Major point to be addressed.**

As for the description of the dynamical and biogeochemical models, we decided to add a specific section on the *Trichodesmium* explicit representation in the model. In this description we answer questions about mortality and grazing. To summary, there is a term of natural mortality on *Trichodesmium* and this term is similar to the other modeled phytoplankton species. The two types of zooplankton are able to graze *Trichodesmium*, but we applied two different coefficients for the grazing preference. For microzooplankton, grazing preference is halved to account for *Trichodesmium* toxicity (O'Neil and Romane, 1992).

### « 2.1.3 *Trichodesmium* compartment

For the purpose of this study, we implemented in the PISCES-QUOTA version an explicit representation of *Trichodesmium*. Therefore, as already stated, five living compartments are modeled with three phytoplankton groups (nanophytoplankton, diatoms, and *Trichodesmium*) and two zooplankton groups (microzooplankton, and mesozooplankton). Similarly to nanophytoplankton (Equation 1 in Kwiatkowski et al., submitted), the equation of *Trichodesmium* evolution is computed as follows:

$$\frac{\partial Tri_C}{\partial t} = (1 - \delta^{Tri}) \mu^{Tri} Tri - \zeta_{NO_3}^{Tri} V_{NO_3}^{Tri} - \zeta_{NH_4}^{Tri} V_{NH_4}^{Tri} - m^{Tri} \frac{Tri_C}{K_m + Tri_C} Tri_C - sh * w^{Tri} P^2 - g^Z(Tri) Z - g^M(Tri) M \quad (\text{Eq. 1})$$

In this equation,  $Tri_C$  is the carbon *Trichodesmium* biomass, and the seven terms on the right-hand side represent respectively growth, biosynthesis costs based on nitrate and ammonium, mortality, aggregation and grazing by micro- and mesozooplankton.

In our configuration, the photosynthesis growth rate of *Trichodesmium* is limited by light,

temperature, phosphorus and iron availability. Photosynthesis growth rate of *Trichodesmium* ( $\mu^{Tri}$ )

is computed as follows:  $\mu^{Tri} = \mu_{FixN_2}^{Tri} + \mu_{NO_3}^{Tri} + \mu_{NH_4}^{Tri}$  (Eq. 2)

where  $\mu_{FixN_2}^{Tri}$  denotes growth due to dinitrogen fixation,  $\mu_{NO_3}^{Tri}$  and  $\mu_{NH_4}^{Tri}$  represent growth

sustained by  $NO_3^-$  and  $NH_4^+$  uptake, respectively. Moreover, a fraction of fixed nitrogen is released back to seawater, mainly as ammonia and dissolved organic nitrogen, by the simulated *Trichodesmium* compartment. Berthelot et al. (2015) estimated this fraction to be less than 10% when considering all diazotrophs. We set up this fraction at 5% of the total amount of fixed nitrogen. For the other nutrients (i.e. iron and phosphorus), the same fraction is also released.

Dinitrogen fixation is limited by the availability of phosphate, iron and light and is modulated by temperature.

Loss processes are natural mortality, and grazing by zooplankton. Natural mortality is considered to be similar to the other modeled phytoplankton species. Grazing on *Trichodesmium* is rarely described, but it is admitted that *Trichodesmium* represents a poor source of food for zooplankton (O'Neil and Romane, 1992) especially because they contain toxins (Hawser et al., 1992). On the other hand, few species of copepods (mainly mesozooplankton) have been shown to be able to graze on *Trichodesmium* despite the strong concentrations of toxins (O'Neil and Romane, 1992).

For these reasons we applied two different coefficients for the grazing preference by mesozooplankton and microzooplankton (Table 1). For microzooplankton, grazing preference is halved to account for *Trichodesmium* toxicity, and for mesozooplankton the grazing preference is similar to that of the other phytoplankton species. The complete set of equations of *Trichodesmium* is detailed in Appendix 1. Table 1 presents the parameters that differ between nanophytoplankton and *Trichodesmium*.

This setup reproduces dinitrogen fixation through an explicit representation of the *Trichodesmium* biomass (to be compared with often used implicit parameterizations (Assmann et al., 2010; Aumont et al., 2015; Dunne et al., 2013; Maier-Reimer et al., 2005; Zahariev et al., 2008) that link directly environmental parameters to nitrogen fixation without requiring the *Trichodesmium* biomass to be simulated). »

- L142-144: please be careful on the use of the term 'growth rate'. Here, I suppose it is the photosynthesis growth rate and it is not the net growth rate (gains minus losses) of *Trichodesmium*. Losses are for example grazing or exudation. Please clarify this point.

We replaced 'growth rate' by 'photosynthesis growth rate' for clarity (L185).

- L148-150: What is the form of nitrogen released by *Trichodesmium*? Is it nitrate and/or ammonium or dissolved organic nitrogen? No information is given on this feature while it is crucial to understand how *Trichodesmium* can be a source of nitrogen for the plankton community. Moreover, no further information is given on the ability of *Trichodesmium* to release other element like phosphorus, iron while they are also expected to be constitutive of this planktonic genus. Why are the explicit state variables of the *Trichodesmium* compartment in fact? To clarify all that points I suggest to add and comment, in this section, a new figure of schematic diagram showing state variables and processes of the *Trichodesmium* compartment. **Major point to be addressed.**

It is the belief of the authors that those points have been addressed in the added section « *Trichodesmium* compartment », already given in response to comments on Line 129 to 141. The idea of adding a diagram has been carefully scrutinized. An informative diagram would have been rather complex and hard to decipher. A more synthetic diagram would be less complex but very close to the already published PISCES diagram. At present, the description in the manuscript has been significantly strengthened and should be clearer than a complex diagram.

In this section, no reference to table 1 is indicated while it is the table of some parameters of the biogeochemical model. More problematic is that all the choices of parameter values are nowhere



discussed in the paper. No references are given in the Table 1. On what criteria have been chosen the values of all these parameters? Is it an arbitrary choice as the exuded fraction of nitrogen by *Trichodesmium* or from literature? There is an urgent need to justify the values of each parameter presented. I have also some other remarks on the table 1 (see section on table comments hereafter). As another example we don't know why the preference of microzooplankton for *Trichodesmium* is higher than that of mesozooplankton. I would like to see in the revised version a detailed section on this point. **Major point to be addressed.**

Table 1 has been modified to include the references from which the parameter values for *Trichodesmium* have been derived. For nanophytoplankton, parameters values are taken from Aumont et al. (2015). For other parameters, like zooplankton preferences for example, those points have now been addressed in the added section « *Trichodesmium* compartment », given in response to comments on Line 129 to 141.

Furthermore in the section 2.2 (L159-170), crucial information is lacking about the sediment iron flux while it is a key point debated in the present study. What is the value of this flux and its origin (i.e. literature)? Is it a homogenous spatial flux on the whole model grid or only around some islands? One can imagine for example a decreasing flux from coastal to offshore areas. Neither detailed information nor references to previous works are given. **Major point to be addressed.**

“The atmospheric deposition of iron is derived from a climatological dust simulation (Tegen and Fung, 1995). The iron from sediment is recognized as a significant source (Johnson et al., 1999; Moore et al., 2004). This iron source is parameterized in PISCES as, basically, a time-constant flux of dissolved iron ( $2 \mu\text{mol}/\text{m}^2/\text{day}$ ) applied over the whole sediment surface and modulated depending only on depth. A detailed description of this sedimentary source is presented in Aumont et al. (2015).”

Those informations are now given in the “PISCES” section that has been provided to the reviewer in response to its comments on line 128 to 155.

Section 2.3. An important question arises after reading this part of paper. Have the data of OUTPACE cruise been really used to validate the coupled model? This point is not clear to me because the OUTPACE cruise has been carried out in 2015 year while the reference simulation ends 2013 (L160). Several captions of the figures indicate that ‘Model values have been sampled at the same location, the same month and the same depth as data’. So I can't understand how it is possible to use the OUTPACE dataset in this paper to validate model output as suggested l175-176 for iron.

### Major point to be addressed.

Indeed, this comment is a consequence of our misleading presentation of our model forcing strategy. As explained in a previous comment, our model simulation is climatological. Therefore, the model does not produce any interannual variations. Thus, we compare the model to the observations by sampling our model at the same month and location as the observations. The February to April 2015 OUTPACE observations have then been compared to climatological February to April model outputs. We changed the figures captions to clarify this point:

« Model values have been sampled at the same location, same month (climatological month vs real month), and same depth as the data. »

### 5. Results.

-L193. Phosphate patterns. 'in qualitatively good agreement'. Assertion to be moderated. The model strongly underestimates the areas of high concentrations as within the Costa Rica dome and along the equator.

We have modified the text in the revised version of the manuscript to acknowledge this point :  
« First, phosphate patterns show modeled values and structures in qualitatively good agreement with observations, despite an underestimation in the areas of high concentrations such as within the Costa Rica dome and along the equator. » (L244-246)

-L197. 'Regions most favourable for *Trichodesmium* can be defined by temperature within 26-29°C'. What is the criterion behind this statement? Is it from literature or from a model results (highest biomasses of *Trichodesmium*)? Author refers these two temperature limits to preferendums in the caption of Fig. 1. How are defined these preferendums?

In the appendix (L528), Equation 3 shows the computation of the temperature limitation term. This statement is based on this equation 3, which shows that the temperature preferendum is reached at ~27°C. Over the range 20-34°C, the limitation function is symmetrical around 27°C, which is the center of the 25-29°C interval. We added a reference to Breitbarth et al., (2007) who proposed this empirical equation (Breitbarth et al., 2007).

-L201-202. I don't agree with the sentence on the good reproduction of seasonal variability of SST along the equator by the model. The 26°C isotherm migrates by 15° eastward in the model from summer to winter but this migration is not observed in the SST field.

We added some text in the revised version of the manuscript to underline this bias:

« By contrast, along the equator the mean position of the 25°C isotherm is shifted eastward in the

TRI simulation (~120°W) compared to the observations (~125°W; Fig. 1a vs 1b), but its seasonal displacements are well reproduced except in the South-Eastern Pacific. » (L254-256).

-L205. Please indicate the type of statistical test (and probability) used to prove the result of ‘no statistical differences’.

We added in the text these informations:

« The median value as well as the dispersion of the iron surface concentrations over the tropical Pacific, are displayed for both the data and the model in Figure 2a. Mann-Whitney test reveals that these two normalized distributions are not significantly different (p-value = 0.26). » (L260-263).

-L214. ‘with mean values higher than 0.3 mgChl m<sup>-3</sup>’.

The text has been amended (L271).

-L221. ‘Those localized chlorophyll . . . effect’. This sentence should be in discussion.

-L224-225. ‘TRI simulation thus appears. . .’ This sentence should be in discussion.

We moved these two sentences in the discussion section.

-L232. ‘SPG’. Acronym not defined.

We modified the text to define the acronym:

« This bias in the model could be explained by the overestimated iron concentrations in the South Pacific Gyre (SPG). » (L288).

-L236-253. There is neither clear explanation nor associated analysis why the numerical N<sub>2</sub> fixation rates are compared with data over two different integration layers (Fig. 4).

We added those sentences to explain the reasons of these two integration layers:

« Some areas are sampled only in the surface layer (0-30m) while others have been sampled deeper. This non-homogeneous sampling may alter the distribution of the N<sub>2</sub> fixation rates and undermine the comparison with model outputs. To assess and overcome this sampling bias we compared the observations with simulated N<sub>2</sub> fixation rates over two different integration layers (0-30m and 0-150m). » (L294-296).

-L244. Same as my previous remark on the use of OUTPACE iron data in the validation step of model (section 2.3.). How OUTPACE N<sub>2</sub> fixation data ‘(Bonnet et al., this issue)’ can be used to validate the model as the simulation ends 2013?

As previously mentioned, the model simulations are climatological. Thus, data comparisons are

made vs. seasonal climatologies.

-L247. 'In general, ... compared to data'. This sentence is vague and then confusing. Is an overestimation on the whole modelled domain, or only in one sector especially? Is this statement applicable for the rates depth-integrated 0-150m or 0-30m, or both?

The text has been modified to make this sentence clearer:

« On the whole modeled domain and for both integration layers, dinitrogen fixation rates are overestimated by ~70% in TRI compared to the data. » (L305-306).

-L256. The Figure 6 should be numbered 5 instead 6 because it follows the description of Figure 4. Figures 5,6,7 are now 7,5,6 respectively.

-L261. 'PNG'. Acronym not defined.

We now defined this acronym in the following sentence:

« Maximum values are located in the South West Pacific (around Vanuatu archipelago, New Caledonia, Fiji, and Papua New Guinea (PNG)) and around Hawaii, where they reach 0.06 mg Chl.m<sup>-3</sup>. » (L284).

-L272. Why does Author indicate the term 'not shown' for the simulated N<sub>2</sub> fixation rates and Trichodesmium biomass as they are presented on Figures 5 and 7, respectively?

Indeed, this is shown in figures 6 and 7 (with the updated numbering) which are now properly referenced (L330).

-L275. 'Figure (6 a,b)' instead Figure (7a,c).

Text has been modified (L333)

-L284. Same remark as L205.

The requested information has been added in the text (L341-343).

« They proved that vertically integrated dinitrogen fixation rates are statistically significantly (one-way ANOVA,  $p < 0.01$ ) lower from November to March (less than 200  $\mu\text{mol N m}^{-2} \cdot \text{d}^{-1}$ ) than from April to October (about  $263 \pm 147 \mu\text{mol N} \cdot \text{m}^{-2} \cdot \text{d}^{-1}$ ) as highlighted in Figure 7a (blue dots). »

-L286. 'Figure 7a' instead 'Figure 5a'.

The numbering has been corrected (L344)

-L303. Please replace 'in the sampling' by 'in the field observations'.

We have replaced 'in the sampling' by 'if sampled at the observed stations' (L 361-362).

-L306-308. What about the other factors (as grazing or natural mortality if existing)? What is the type of analysis exactly, leading to the conclusion 'the seasonal variability is mainly controlled by primary production'? Please replace the term 'by primary production' by 'by the levels of primary production'.

The other loss terms such as natural mortality and grazing have been analyzed in a similar manner to what is shown in Figure 7. This analysis showed that they do not control the shape of the seasonal cycle. They rather play a role in its amplitude, not in its shape. That's the reason why we have not shown the analysis in the manuscript. We have modified the text to discuss this point in the manuscript :

« To further investigate the mechanisms that drive the seasonal variability of *Trichodesmium* in the Pacific, we examined the factors that control *Trichodesmium* abundance in the TRI simulation (not shown). This decomposition shows that the physical terms (advection and mixing) are negligible compared to biological terms. In addition, the seasonal cycles of grazing and mortality are in phase with the production terms but their sign is opposite. In conclusion, this analysis indicates that this seasonal variability is mainly controlled by the levels of primary production, the others terms of tracer evolution dampen its amplitude but do not change its shape. » (L365-370).

You can see this analysis in Fig. Supp 3.

Furthermore, following your suggestion, the term 'primary production' has been replaced by 'by the level of primary production' (L369).

-L312-316. Would it be possible to see (in a new table for example) a synthesis of the modelled values of *Trichodesmium* growth rates of and a comparison of them with those observed in the field if existing or in lab experiments.

This would have required to add the *Trichodesmium* growth rates as outputs of our simulations, which is not the case, and would require a significant amount of time to be processed (all simulations would have to be rerun). Furthermore, the growth rates of *Trichodesmium* simulated in our model do exhibit a strong spatial and temporal variability which makes the presentation in a table challenging. A comparison with in situ data is difficult to perform because appropriate data are very scarce in the literature to our knowledge. Most data focus on nitrogen fixation rates and more occasionally, on net population growth rates, rather than on in situ photosynthetic growth rates. Many more observations based on laboratory experiments are available but they correspond to

controlled conditions which are difficult to compare to the actual conditions simulated by our model.

-L324-326. 'Indeed, . . . temperature'. This sentence should be placed in discussion. Furthermore, this sentence is highly debatable. Please be cautious with the concept of 'ocean dynamics mainly 1D'! Is this feature really achieved anywhere in the ocean? Can the Author firmly prove this assertion in the simulations presented in this study?

Indeed, this reference to a 1D- ocean was mentioned to stress that the seasonal enhanced vertical mixing is bringing to the euphotic zone iron-replete waters that are cold water masses in our boxes, and hence have antagonist effects on the *Trichodesmium* biomasses. Thus, we proposed the following new wording which insists on the seasonal enhanced mixing without referring to a 1D-ocean:

« Indeed, nutrients and iron inputs brought to the euphotic zone by the seasonally enhanced vertical mixing are counter-balanced by the related inputs of cold water masses. » (L386-388)

However to prove our assertion we performed a new analysis (Fig. Supp 3). This figure show the decomposition of all physics terms for iron tracer in south pacific (red box, integrated over the top 150m of the ocean, and averaged on the region; Fig 1c). We find that vertical mixing dominates the other terms (advection and horizontal mixing) all the year except in November and December. Moreover, the correlation coefficient between vertical mixing and the iron time rate of change is 0.95, therefore at the 0 order the vertical mixing controls the iron time rate of change. Obviously for this tracer it is also necessary to take into account the evolution of biological terms.

## 6. Discussion.

-L369. I would like to see a clear definition of the term 'bio-available nitrogen'. Is it dissolved inorganic forms of nitrogen and/or organic forms also?

This terms refers to the nitrogen forms that can be taken up by phytoplankton. In our model, that is nitrate and ammonium. This definition has been appended in the manuscript.

« *Trichodesmium* also releases a fraction of the recently fixed N<sub>2</sub> as bio-available nitrogen (in our model, *Trichodesmium* releases ammonia and dissolved organic nitrogen, but only ammonia is directly bio-available). » (L436-438)

-L393. 'to that of' instead of 'than'.

The text has been corrected (L449).

-L400-403. What is the actual reason for a better modelling of N<sub>2</sub> fixation by using an explicit

representation of this process in the model? At the place of the manuscript one can expect a deeper analysis of the results. A thorough comparison of the two types of formulation could be lead to explain clearly why using the explicit formulation is an improvement. Is it due, for example, to the inclusion of Fe internal quota in the formulation of *Trichodesmium* photosynthesis growth rate?

**Major point to be addressed.**

We agree with the reviewer that a more detailed analysis of the factors that explain the differences between the implicit and explicit formulations would be interesting. However, such comparison is far from being easy to carry out. The main reason for this difficulty is that the explicit formulation includes multiple non-linear interactions (grazing, growth ...) that are not represented in the implicit parameterization. These non-linearities are probably an explanation to the better behavior of the explicit model. They allow the model to predict blooms of *Trichodesmium* and as explained in the manuscript, the main improvement brought by the explicit representation of *Trichodesmium* is the larger biomass, especially near the islands.

To deepen this comparison we decided, following the comment of the other reviewer, to add 2 analysis, in order to compare the N<sub>2</sub> fixation rate (Fig. Supp 1) and the carbon export (Fig Supp 2) in TRI an TRI\_imp simulations.

Figure supp. 1 represents the carbon export (under the euphotic layer, in  $\mu\text{mol N.m}^{-2}\text{d}^{-1}$ ) comparison and the figure supp. 2 represents the N<sub>2</sub> fixation rate comparison (integrated over top to 150m, panel a in  $\text{mmol C. s}^{-2}.\text{d}^{-1}$  and panel b in percentage). We observe a carbon export greater in TRI simulation, the average across the Pacific of this difference is  $0.1\text{mmol C.m}^{-2}.\text{d}^{-1}$  or 4 %, and in LNLC regions the increase varies between 6 and 10 %. The N<sub>2</sub> fixation rates are greater in TRI simulation except in the warm pool, in the equatorial upwelling, and in Peru upwelling.

## **7. Appendix.**

In this section all the equations presented should be numbered for clarity.

We numbered all the equations.

-L477. I suggest to write 'phosphorus or iron' rather than 'phosphorus and iron'.

We replaced « phosphorus or iron» by «phosphorus and iron».

-L479-480. On which basis (literature, experimental works?) the equations of phosphorus and iron limitations have been stated? Are they new formulations? What physiological processes drive the choice of this formulation? I would like to see information on that point in the revised ms.

As described in PISCES section, the formulations stems from the chain model of Pahlow and Oschlies (2009):

« Nutrients uptake and assimilation as well as limitation of growth rate are modeled according to the chain model of Pahlow and Oschlies (2009). The P quota limits N assimilation which in turns limits phytoplankton growth. The phosphorus to nitrogen ratios of phytoplankton are described based on the potential allocation between P-rich biosynthesis machinery, N-rich light harvesting apparatus, a nutrient uptake component, the carbon stores, and the remainder (Daines et al., 2014; Klausmeier et al., 2004). This allocation depends on the cell size and on the environmental conditions ».

-L480. 'Nutrient quota for Fe and phosphorus' rather than 'Nutrient quota for Fe and PO<sub>4</sub>'.

We replaced « Nutrient quota for Fe and PO<sub>4</sub> » Nutrient quota for Fe and phosphorus » by « Nutrient quota for Fe and phosphorus ».

-L492. Equation of *Trichodesmium* growth rate if iron limiting. Same remark as for L479- 480. Why the N<sub>2</sub> fixation growth rate in case of iron limitation is modelled in this way? It is very difficult to evaluate this formulation without explanation! Furthermore, please be careful in using the term  $\mu_{A, a}$  that can be confused with the term  $\mu_{A, aI}$  (initial slope of P. vs. I.). It is not clear to me if the value of  $\mu_{TRIMAX}$  is of 0.25 d<sup>-1</sup>? If yes, please clearly indicate in the table of parameters (Table 1) its value and at l473. The term LI is used while undefined.

We changed the organization of this section, and we rewrote the equations differently in more details in order to facilitate their understanding.  $\mu_{TRIMAX}$  is the maximum observed growth rate, and this value comes from the experiences of Breitbarth et al. (2007).

-L518. While the limiting function by temperature is defined previously (L471, LT), the limiting function by light is not presented and it deserves to show it. What is the exact form of the term LI defined by the author?

It is now specified in the manuscript that the light limitation remains similar between the *Trichodesmium* and the nanophytoplankton groups. This limitation is fully detailed in Aumont et al. (2015): « Visible light is split into three wavebands: blue (400-500 nm), green (500-600nm) and red (600-700nm). For each waveband, the chlorophyll-dependent attenuation coefficients are fitted to the coefficients computed from the full spectral model of Morel (1988) (as modified in Morel and Maritorena (2001)) assuming the same power-law expression. At the sea surface, visible light is split equally between the three wavebands ».

-L521. Please be cautious in using the terms of 'new and regenerated production' in this context. The growth rates of *Trichodesmium* based on nitrate and ammonium are not strictly speaking new



and regenerated productions, respectively. Please reconsider this sentence and formulate your idea with accuracy.

This sentence has been removed, and generally the appendix section has been fully reworked to answer your comments.

Below the new appendix section:

« *Trichodesmium* preferentially fixes dinitrogen at temperature between 20-34°C (Breitbarth et al., 2007). The temperature effect on the growth rate is modeled using a 4<sup>th</sup> order polynomial function (Ye et al., 2012):

$$L_{Tri}^T = \frac{2,32 \cdot 10^{-5} \times T^4 - 2,52 \cdot 10^{-3} \times T^3 + 9,75 \cdot 10^{-2} \times T^2 - 1,58 \times T + 9,12}{0,25} \quad (\text{Eq. 3})$$

where  $0.25d^{-1}$  is the maximum observed growth rate (Breitbarth et al., 2007). Hence, at 17°C the growth rate is zero and maximum growth rate is reached at 27°C. The *Trichodesmium* light limitation is similar to nanophytoplankton (Aumont et al. (2015)).

From equation 2, we distinguish 2 cases for the growth rate due to nitrogen fixation.

if phosphorus is limiting equation 2 becomes :

$$\mu_{Fix} = \mu_{max}^{Tri} \cdot L_I^{Tri} \cdot L_P^{Tri} - \left( \mu_{NO_3}^{Tri} + \mu_{NH_4}^{Tri} \right) \quad (\text{Eq. 4a}) \quad \text{with} \quad L_P^{Tri} = \min \left( 1, \max \left( 0, \frac{(\theta^P - \theta_{min}^P) \times \theta_{max}^P}{(\theta_{max}^P - \theta_{min}^P) \times \theta^P} \right) \right) \quad (\text{Eq. 4b})$$

if iron is limiting :

$$\mu_{Fix} = \mu_{max}^{Tri} \cdot L_I^{Tri} \cdot L_{Fe}^{Tri} - \left( \mu_{NO_3}^{Tri} + \mu_{NH_4}^{Tri} \right) \quad (\text{Eq. 5a}) \quad \text{with} \quad L_{Fe}^{Tri} = \min \left( 1, \max \left( 0, \frac{(\theta^{Fe} - \theta_1^{Fe}) \cdot \theta_{opt}^{Fe}}{(\theta_{opt}^{Fe} - \theta_0^{Fe}) \cdot \theta^{Fe}} \right) \right) \quad (\text{Eq. 5b})$$

In equation 4b,  $\theta_1^{Fe}$  and  $\theta_0^{Fe}$  are computed as follows :

$$\theta_1^{Fe} = \theta_0^{Fe} + \alpha \cdot \mu_{Fix} \quad (\text{Eq. 6a}), \quad \theta_0^{Fe} = \theta_{min}^{Fe} + m \quad (\text{Eq.6b}), \quad \text{and} \quad \alpha = \frac{1}{\beta} \quad (\text{Eq. 6c})$$

$\theta^{Nutrients}$  represents the nutrient quota for Fe and phosphorus (i.e, the ratio between iron and carbon concentrations in *Trichodesmium*, for instance).  $\theta_{min}^P$ , and  $\theta_{opt}^{Nut}$  are constants, whereas  $\theta^{Nutrients}$  varies with time. The minimum of  $L_{Fe}^{Tri}$  and  $L_P^{Tri}$  defines the limiting nutrient.  $L_I$  is the limiting function by temperature and light.

$m$  represents the difference between the maintenance iron (i.e, the intracellular Fe:C present in the cell at zero growth rate) under diazotrophic growth and growth on ammonium (Kustka et al., 2003).  $\beta$  is the marginal use efficiency and equals the moles of additional carbon fixed per additional mole of intracellular iron per day (Raven, 1988; Sunda and Huntsman, 1997).

The demands for iron in phytoplankton are for photosynthesis, respiration and nitrate/nitrite reduction. Following Flynn and Hipkin (1999), we assume that the rate of synthesis by the cell of new components requiring iron is given by the difference between the iron quota and the sum of the iron required by these three sources of demand, which we defined as the actual minimum iron quota:

$$\theta_{min}^{Fe} = \frac{0.0016}{55.85} \theta_{Tri}^{Chl} + \frac{1.2110^{-5} \times 14}{55.85 \times 7.625} L_P^{Tri} + \frac{1.1510^{-4} \times 14}{55.85 \times 7.625} L_{NO_3}^{Tri} \quad (\text{Eq. 7})$$

In this equation, the first right term corresponds to photosynthesis, the second term corresponds to respiration and the third term estimates nitrate and nitrite reduction. The parameters used in this equation are directly taken from Flynn and Hipkin (1999).

## 8. Bibliography.

Please check carefully this section. Many typos and different formats.

We have checked carefully this section, and corrected many typos and different formats.

## 9. Tables.

Table 1. **Major points to be addressed.** Why are only presented the parameters of *Trichodesmium* and nanophytoplankton? Are the parameters of other living biomass compartments remained unchanged (what is the reference in which the unchanged parameters can be found?)? If yes, why those of nanophytoplankton only have been changed? I would like to see in the revised ms explanations on this point. The column 'Name in the code' is useless (technical details) but adding a column with references for each parameter is essential. The important parameter  $\mu_{TRIMAX}$  is missing in the table. Please check carefully the units of each parameter. According to the definition of  $i_{Ac}$  given in Appendix (L501-502), its unit cannot be in d<sup>-1</sup>. Replace the term 'excretion' by 'exudation' for parameters 'rTri' and 'rI'.

We presented *Trichodesmium* and nanophytoplankton parameters so that we can compare them. The nanophytoplankton and diatoms parameters remain unchanged from Kwiatkowski et al. (2018). Now, this table only displays the *Trichodesmium* parameters that differ from those of nanophytoplankton. The column 'name in the code' has been removed. We changed the unit of marginal use efficiency.

**Table 1 : Models parameters for Trichodemium and nanophytoplakton.**

| Parameters                      | Symbol                      | Unity                                               | Value         | Reference                                       |
|---------------------------------|-----------------------------|-----------------------------------------------------|---------------|-------------------------------------------------|
| Maximum growth rate for Tricho. | $\mu_{\max}^{\text{Tri}}$   | $\text{d}^{-1}$                                     | 0.25          | Breitbarth et al. (2007)                        |
| Maximum growth rate for Nano.   | $\mu_{\max}^{\text{Nano}}$  | $\text{d}^{-1}$                                     | 1.0           |                                                 |
| Initial slope P-I tricho        | $\alpha I$                  | $(\text{W.m}^{-2})^{-1} .\text{d}^{-1}$             | 0.072         | Breitbarth et al. (2008) and Hood et al. (2002) |
| Initial slope P-I nano          | $\alpha I$                  | $(\text{W.m}^{-2})^{-1} .\text{d}^{-1}$             | 2.0           |                                                 |
| Microzoo preference for Tricho. | $pI_{\text{tri}}$           | -                                                   | 0.5           |                                                 |
| Microzoo preference for nano    | $pIP$                       | -                                                   | 1.0           |                                                 |
| Maximum Fe/C in Tricho.         | $\theta_{\text{Fe,Trimax}}$ | $\text{mol Fe.}(\text{mol C})^{-1}$                 | $1.10^{-4}$   | Kustka et al. (2003)                            |
| Maximum Fe/C in nanophyto       | $\theta_{\text{Fe,Imax}}$   | $\text{mol Fe.}(\text{mol C})^{-1}$                 | $4.10^{-5}$   |                                                 |
| Maintenance iron                | $m$                         | $\text{mol Fe.}(\text{mol C})^{-1}$                 | $1.4.10^{-5}$ | Kustka et al. (2003)                            |
| Marginal use efficiency         | $\beta$                     | $\text{mol C.}(\text{mol Fe})^{-1}.\text{day}^{-1}$ | $1.4.10^{-4}$ | Kustka et al. (2003)                            |

## 10. Figures captions.

Fig.1. Typo: 'preferendum'.

[The modification has been done.](#)

Fig. 2. Typo '0-150m'.

[The modification has been done.](#)

Fig. 5b. 'The green curve is the average of the seasonal cycle. . .' This sentence is not clear to me. How is this average built exactly? This is no more clearly explained in the corresponding section (1300-301).

[The sentence has been changed in the figure caption to: « The green curve represents the seasonal cycle computed from model outputs sampled during the same month at the same location than data, which have then be spatially averaged. »](#)

Table 1 : Models parameters for Trichodemium and nanophytoplakton.

| Parameters                      | Symbol                      | Unity                                                | Value         | Reference                                       |
|---------------------------------|-----------------------------|------------------------------------------------------|---------------|-------------------------------------------------|
| Maximum growth rate for Tricho. | $\mu_{\max}^{\text{Tri}}$   | $\text{d}^{-1}$                                      | 0.25          | Breitbarth et al. (2007)                        |
| Maximum growth rate for Nano.   | $\mu_{\max}^{\text{Nano}}$  | $\text{d}^{-1}$                                      | 1.0           |                                                 |
| Initial slope P-I tricho        | $\alpha I$                  | $(\text{W.m}^{-2})^{-1} .\text{d}^{-1}$              | 0.072         | Breitbarth et al. (2008) and Hood et al. (2002) |
| Initial slope P-I nano          | $\alpha I$                  | $(\text{W.m}^{-2})^{-1} .\text{d}^{-1}$              | 2.0           |                                                 |
| Microzoo preference for Tricho. | $pI_{\text{tri}}$           | -                                                    | 0.5           |                                                 |
| Microzoo preference for nano    | $pIP$                       | -                                                    | 1.0           |                                                 |
| Maximum Fe/C in Tricho.         | $\theta_{\text{Fe,Trimax}}$ | $\text{mol Fe.}(\text{mol C})^{-1}$                  | $1.10^{-4}$   | Kustka et al. (2003)                            |
| Maximum Fe/C in nanophyto       | $\theta_{\text{Fe,Imax}}$   | $\text{mol Fe.}(\text{mol C})^{-1}$                  | $4.10^{-5}$   |                                                 |
| Maintenance iron                | $m$                         | $\text{mol Fe.}(\text{mol C})^{-1}$                  | $1.4.10^{-5}$ | Kustka et al. (2003)                            |
| Marginal use efficiency         | $\beta$                     | $\text{mol C.}(\text{mol Fe})^{-1} .\text{day}^{-1}$ | $1.4.10^{-4}$ | Kustka et al. (2003)                            |

Table 2 : List and description of the different experiments.

| <b>Name configuration</b> | <b>N<sub>2</sub> fixation</b> | <b>Iron from sediment</b> |
|---------------------------|-------------------------------|---------------------------|
| TRI                       | explicit                      | yes                       |
| TRI_NoFeSed               | explicit                      | no                        |
| N2_imp                    | implicit                      | yes                       |
| Wo_N2                     | no                            | yes                       |

609 **Figures caption :**

610 Fig. 1 : Annual mean concentrations in  $\mu\text{mol L}^{-1}$ : a) PO<sub>4</sub> data from CARS b) PO<sub>4</sub> simulated by the ROMS-PISCES model c) NO<sub>3</sub>  
611 data from CARS d) NO<sub>3</sub> simulated by the ROMS-PISCES model. On panels (a) and (b), the black contours show the annual mean  
612 patterns of the temperature preferendum from observations (a) and the model (b). The red contours display the 25°C isolign in austral  
613 winter (plain) and in austral summer (dash). On panels (c) and (d) the red boxes represent the LNLC regions (defined as region where  
614  $[\text{NO}_3] < 1 \mu\text{mol L}^{-1}$  and  $[\text{Chl}] < 0.1 \text{ mg Chl.m}^{-3}$ ).

Fig. 2 : Left : Boxplots of the 0-150m averaged Iron ( $\text{nmol Fe.L}^{-1}$ ) data (blue) and the equivalent for the model (red) colocalised with  
the observations in space and time. The coloured box represents the 25-75% quartile of the distribution, the whiskers the 10-90%  
percentile distribution. The line inside the coloured box is the median.

Right : Iron concentrations ( $\text{nmol Fe.L}^{-1}$ ) as observed (b) and as simulated by the model (c). Iron concentrations have been averaged  
over the top 150m of the ocean. Model values have been sampled at the same location, the same month, and the same depth as the  
data.

Fig. 3 : Top : Annual mean surface Chlorophyll concentrations (in  $\text{mg Chl.m}^{-3}$ ) from (a) GLOBCOLOUR data (b) TRI simulation  
and (c) TRI\_imp simulation. Bottom panel (d) shows the the annual mean surface chlorophyll concentrations of *Trichodesmium* in  
the TRI simulation.

Fig. 4 : Nitrogen fixation rates ( $\mu\text{mol N.m}^{-2}\text{d}^{-1}$ ) as observed (left) and as simulated by TRI simulation (right). In the top panels,  
nitrogen fixation rates have been integrated over the top 150m of the ocean. In the bottom panels, the vertical integration has been  
restricted to the top 30m of the ocean. Model values have been sampled at the same location, the same month (climatological month  
vs real month), and the same depth as the data.

Fig. 5 : a) Depth-integrated (0 to 125m) rates of nitrogen fixation ( $\mu\text{mol N.m}^{-2}\text{d}^{-1}$ ) at ALOHA for the data (blue) and TRI simulation  
(red). b) Depth-integrated (from 0 to 150m) rates of nitrogen fixation ( $\mu\text{mol N.m}^{-2}\text{d}^{-1}$ ) in the south Pacific (red box, Fig. 1c) in the  
data (blue) and in the TRI simulation (red). The blue curve is the average of all the model points inside the south Pacific zone (red  
box, Fig. 1c), whereas the green curve corresponds to the average of the model points where data are available..

Fig. 6 : Relative contribution (in percentage) of *Trichodesmium* to total primary production.

Fig. 7 : *Trichodesmium* biomass ( $\text{mmol C.m}^{-2}$ ) in (a) austral summer and (b) austral winter, integrated over the top 100m of the ocean.

Fig. 8 : Seasonal cycle of the limitation terms of *Trichodesmium* production in a) the South Pacific and b) the North Pacific. The right  
scale represents the total limitation.

Fig. 9 : Top : Minimum, mean and maximum in the South box (Fig 1c) of (a) the iron concentrations, and (b) of the chlorophyll  
concentrations of *Trichodesmium*.

Bottom : Annual mean iron concentrations (shading ; in  $\text{nmol Fe.L}^{-1}$ ) and current velocities (vectors ; in  $\text{m.s}^{-1}$ ) for c) the  
TRI\_NoFeSed simulation and d) the TRI simulation. Annual mean Chlorophyll concentrations of *Trichodesmium* ( $\text{mg Chl.m}^{-3}$ ) for e)  
the TRI\_NoFeSed simulation and f) the TRI simulation. The concentrations have been averaged over the top 100m of the ocean. The  
current velocities are identical on the panels a and b.

Fig. 10 : Percentage increase of primary production between the TRI simulation and the Wo\_N2 simulation (top) and the N2\_imp  
simulation (bottom); The left panels show total primary production including the contribution of *Trichodesmium* whereas in the right  
panels, primary production only includes the contribution of diatoms and nanophytoplankton.

Fig. Supp. 1 : Difference of fluxes of carbon export at euphotic layer between TRI simulation and TRI\_imp simulation in  $\text{mmol C.m}^{-2}\text{d}^{-1}$  (a) and in percentage (b).

Fig. Supp. 2 : Depth-integrated (from 0 to 150m) rates of nitrogen fixation ( $\mu\text{mol N.m}^{-2}\text{d}^{-1}$ ) in a) TRI simulation and b) TRI\_imp simulation.

Fig. Supp. 3 : Physic balance of depth-integrated (from 0 to 150m) rate of iron concentrations (in  $\text{mol Fe.m}^{-2}\text{.d}^{-1}$ ) averaged on south Pacific (red box, Fig. 1).

Fig. Supp. 4 : Seasonal cycle of Trichodesmium rate change (in  $\text{mol C.m}^{-2}\text{.s}^{-1}$ ) in the South Pacific.

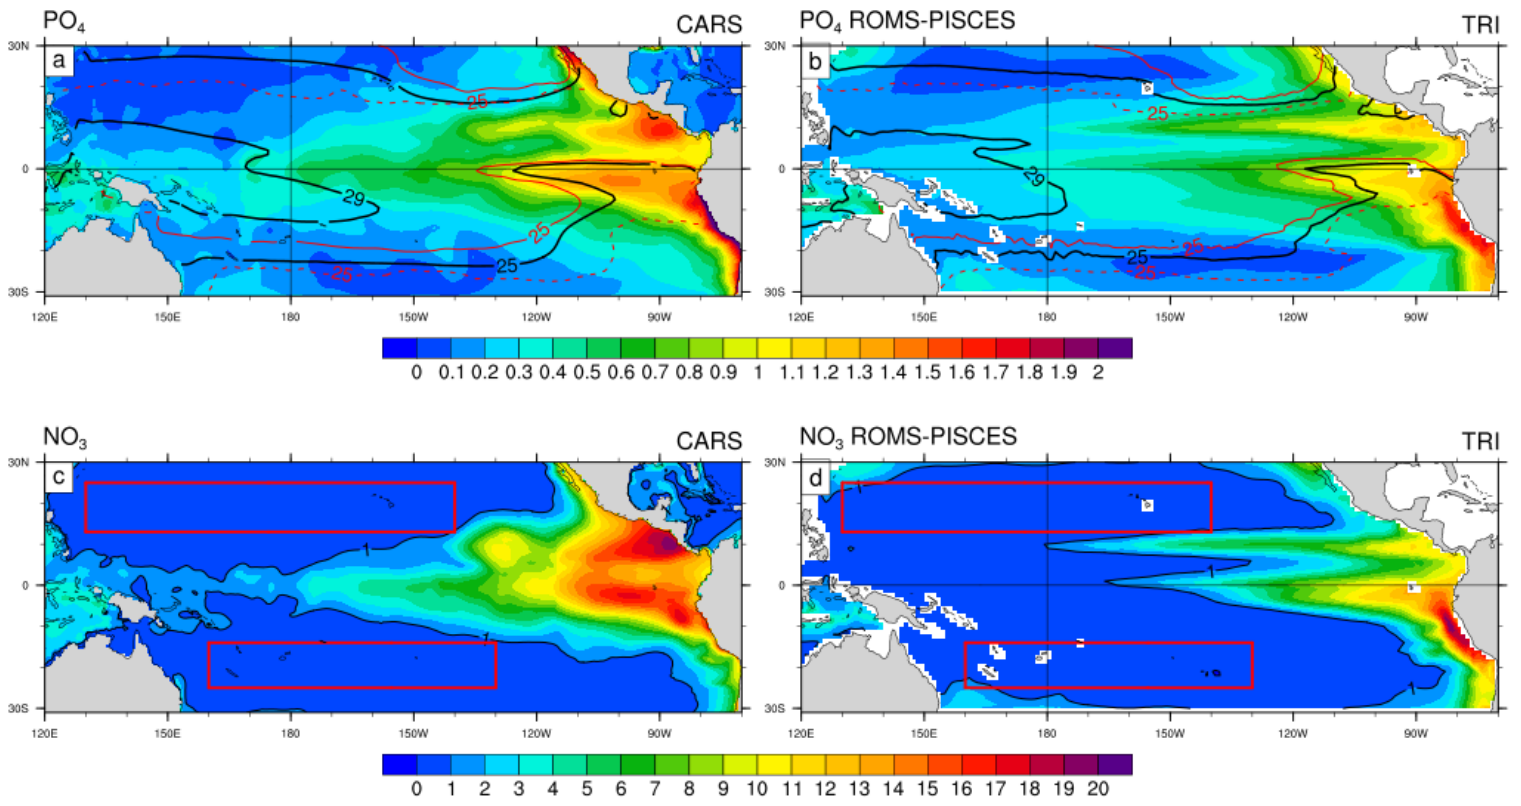

Figure 1



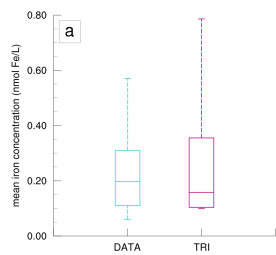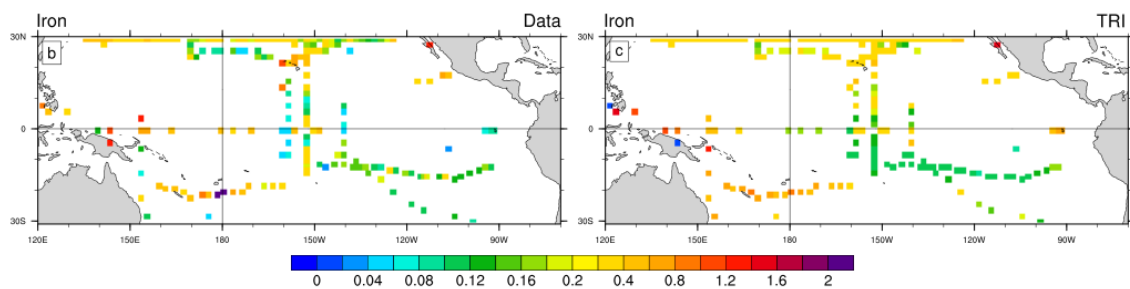

Figure 2

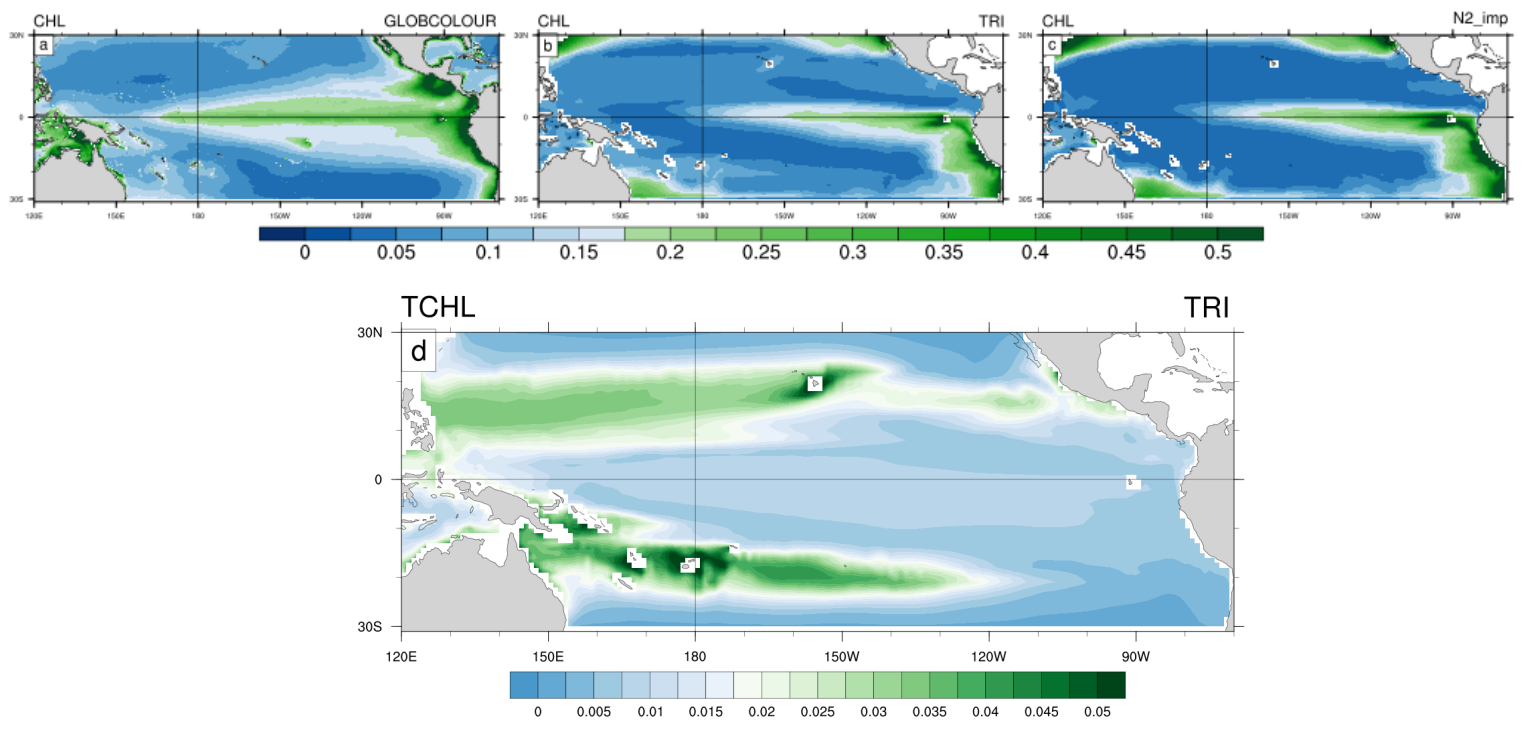

Figure 3

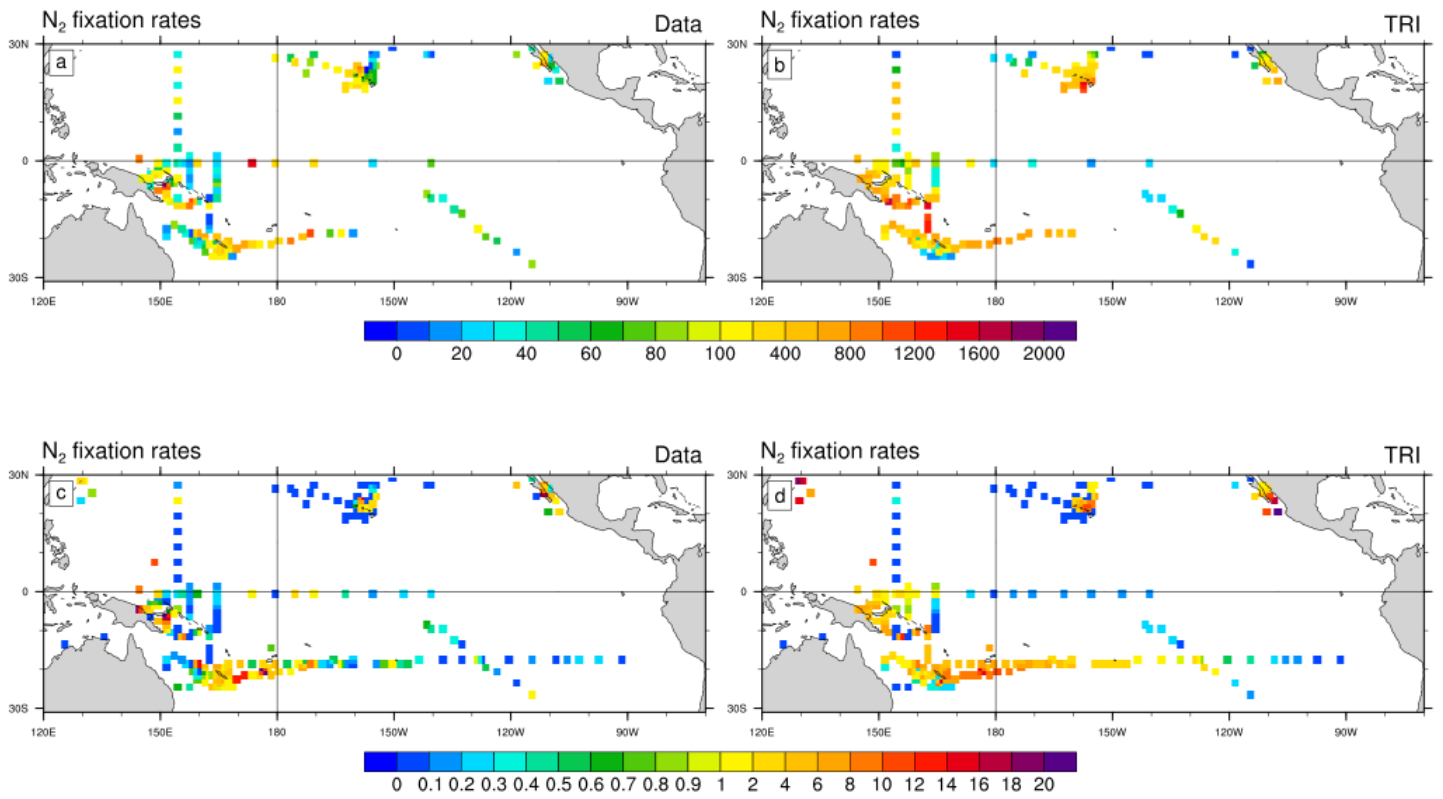

Figure 4

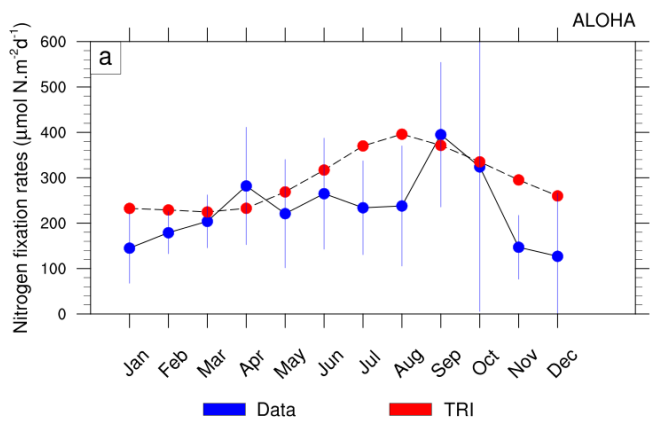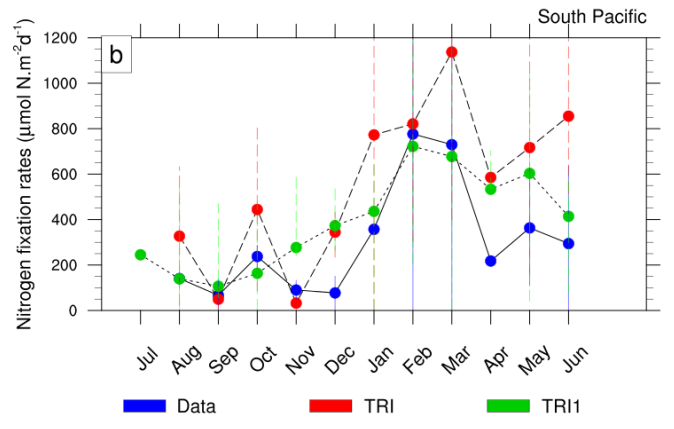

Figure 5

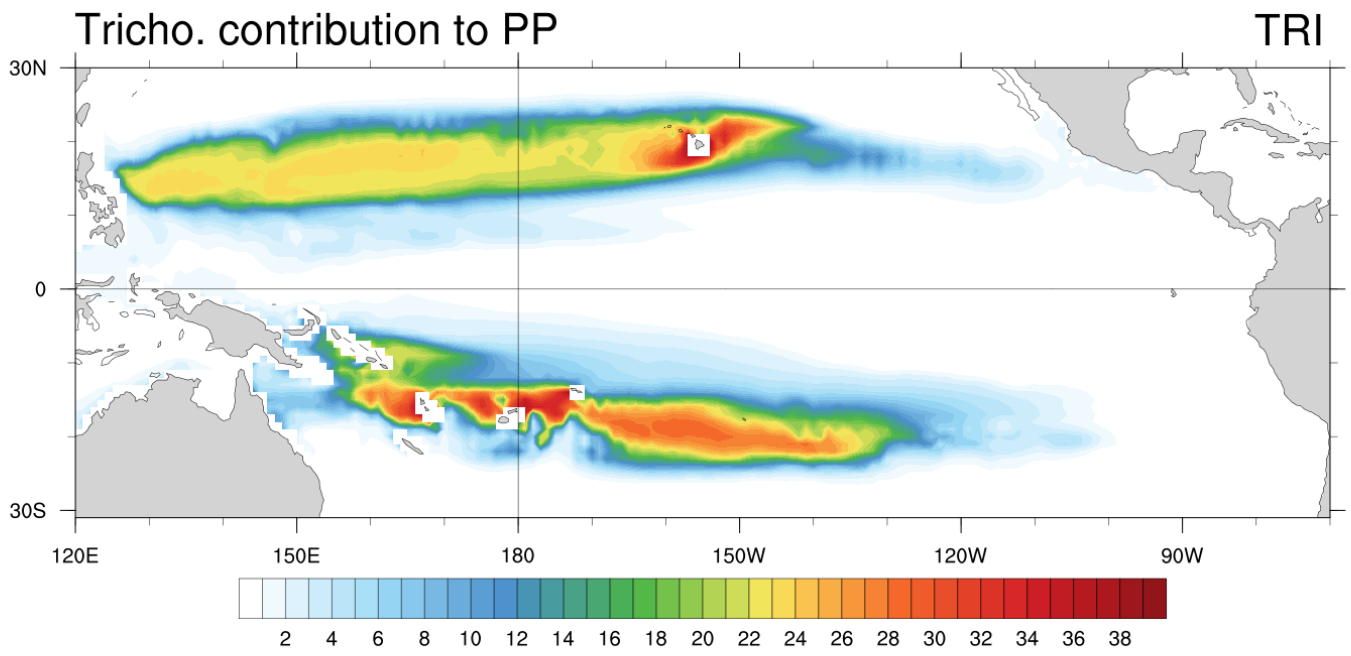

Figure 6

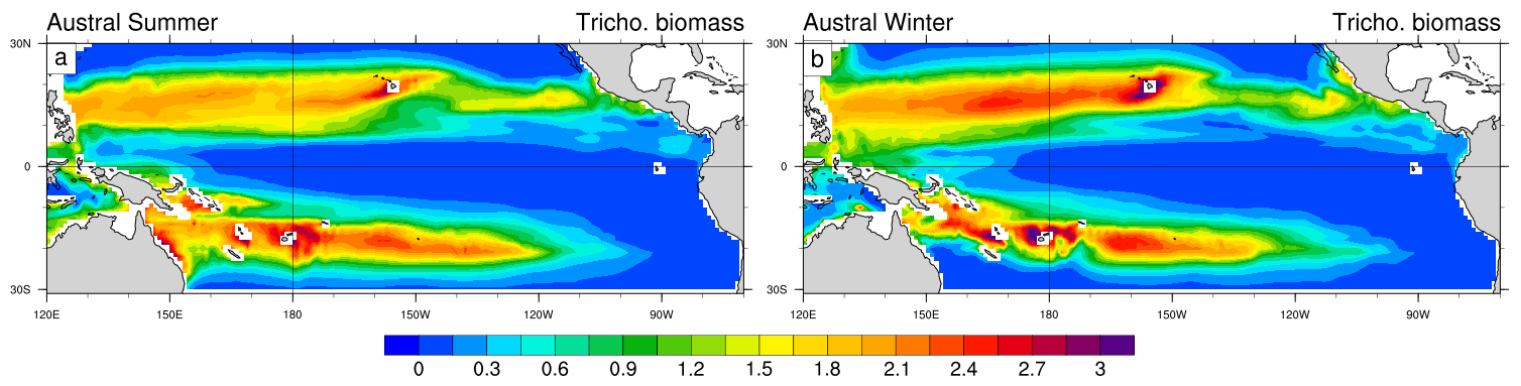

Figure 7

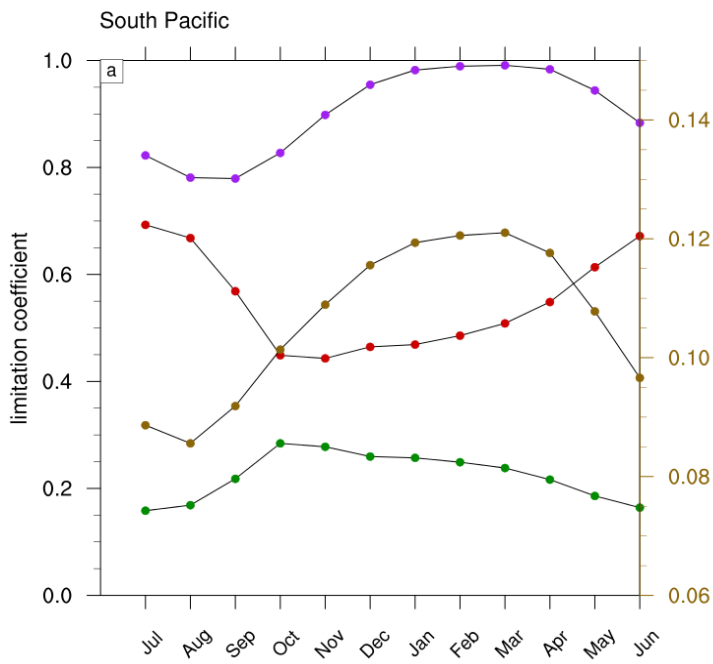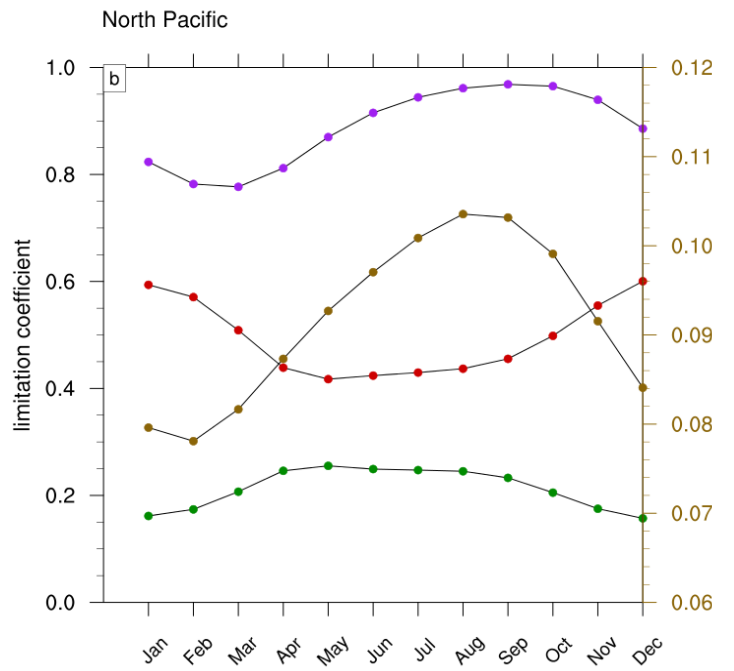

■ Iron

■ Temperature

■ Light

■ All

Figure 8

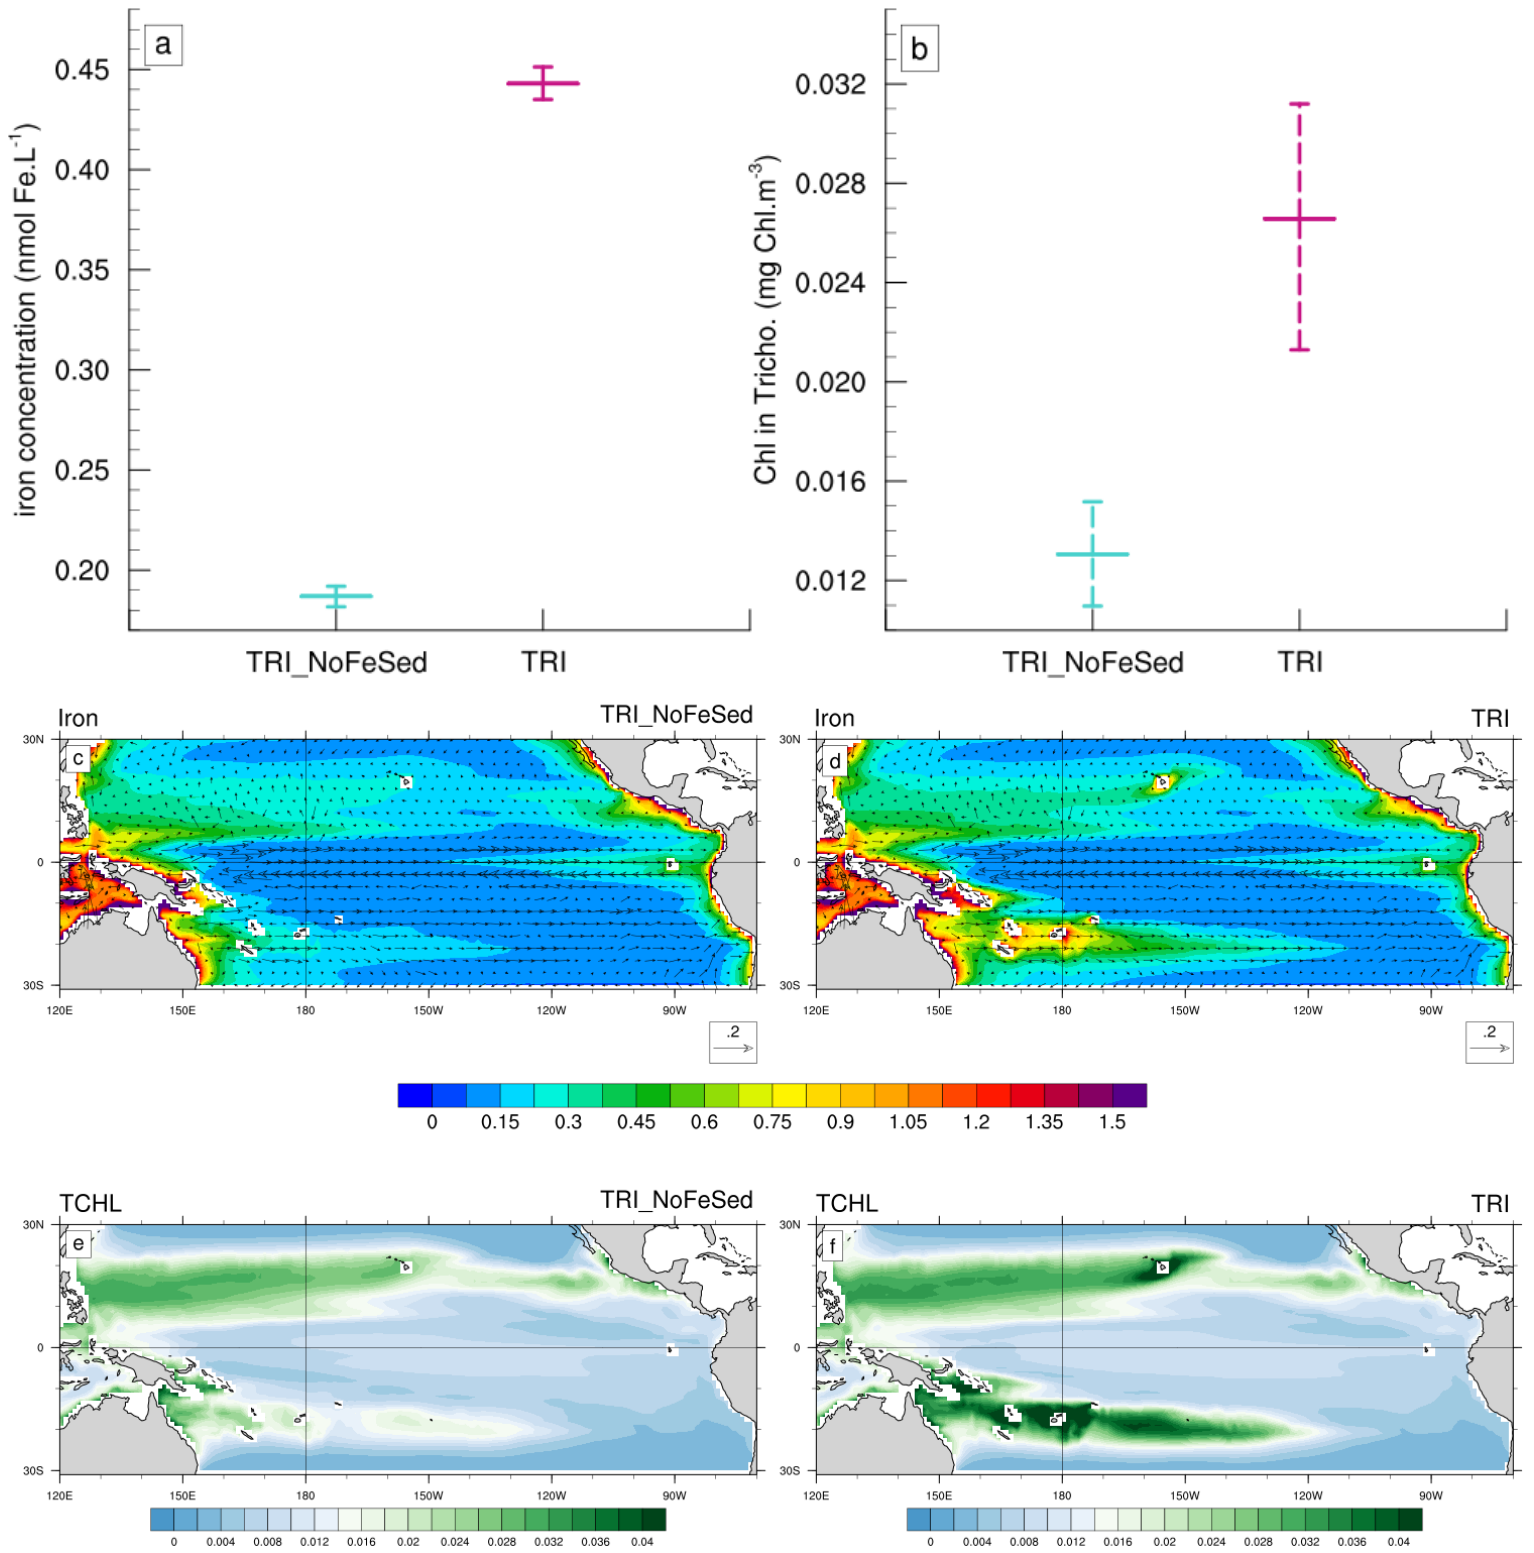

Figure 9



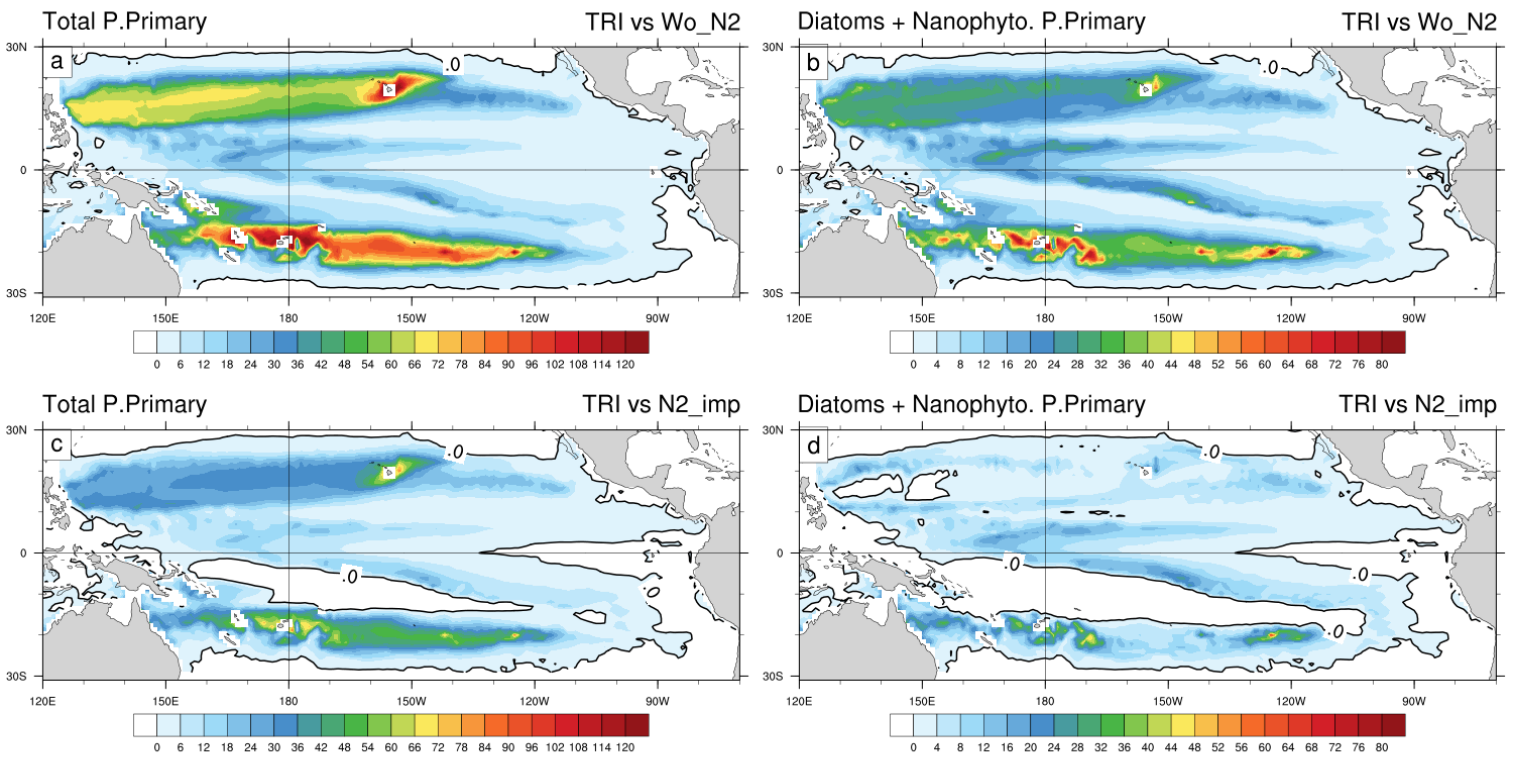

Figure 10

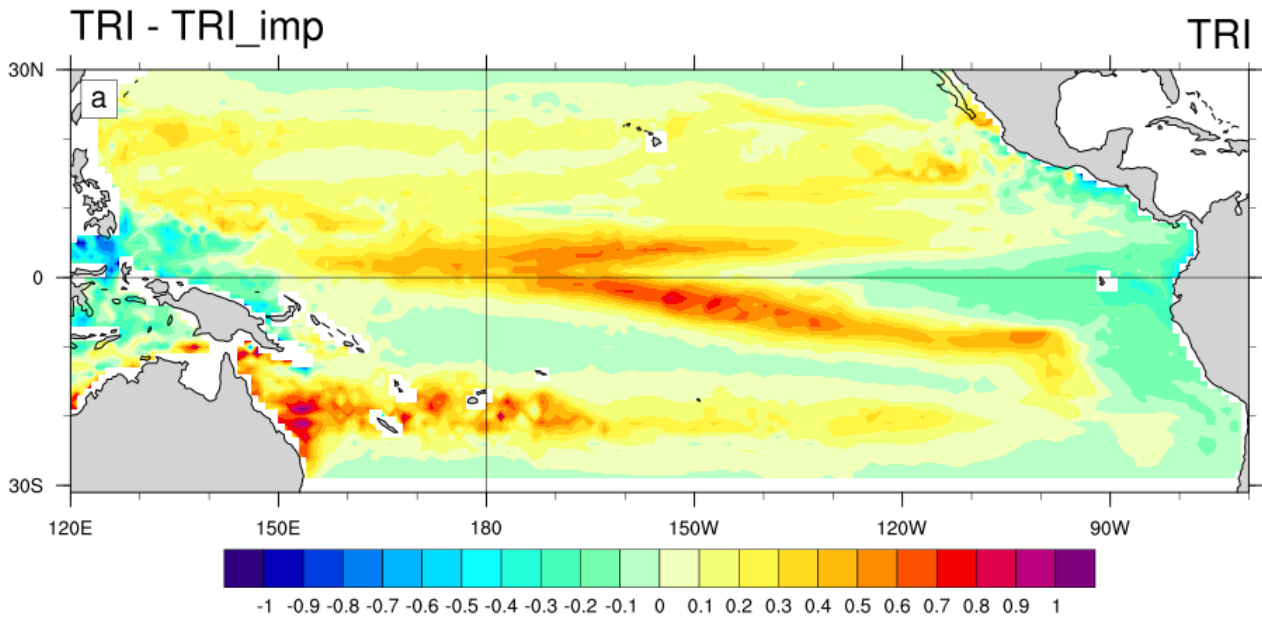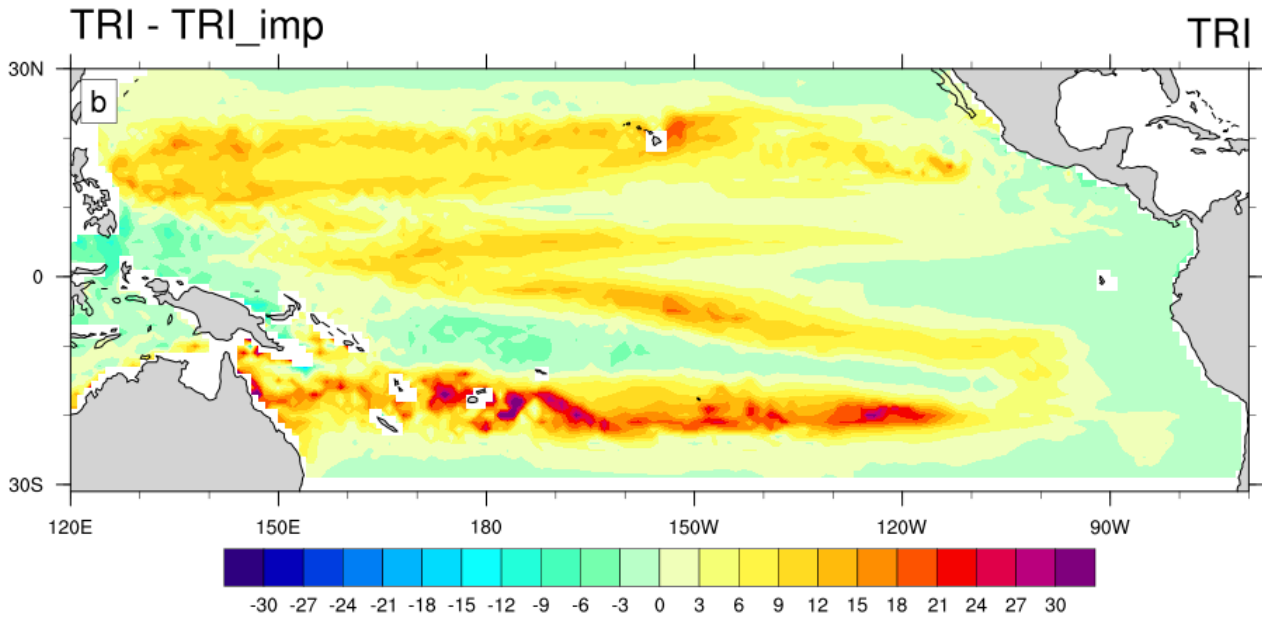

Figure Supp. 1

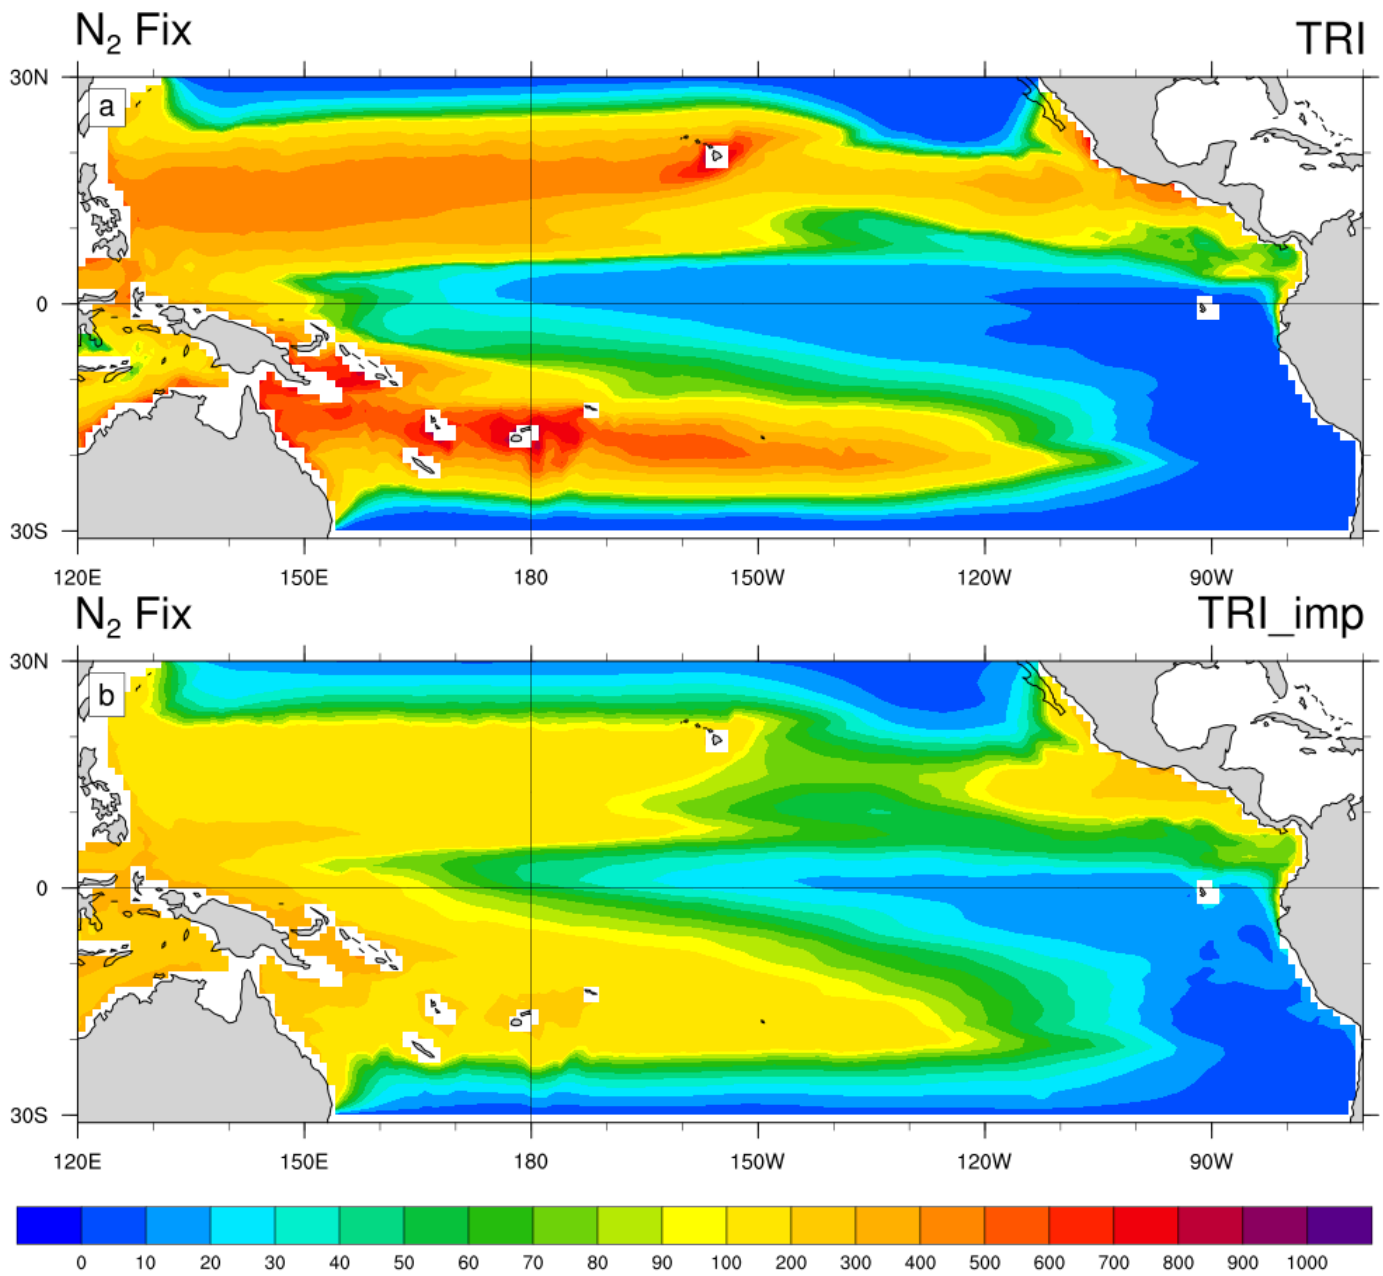

Figure Supp. 2

LONGITUDE : 160E to 130W (XY ave)  
LATITUDE : 25S to 14S (XY ave)  
DEPTH (m) : 0 to 150 (integrated)

FERRRET Ver. 6.95  
NOAA/PMEL TMAP  
17-APR-2018 09:34:35

DATA SET: Z\_roms\_diags\_avg\_TS\_climato

PAC\_1

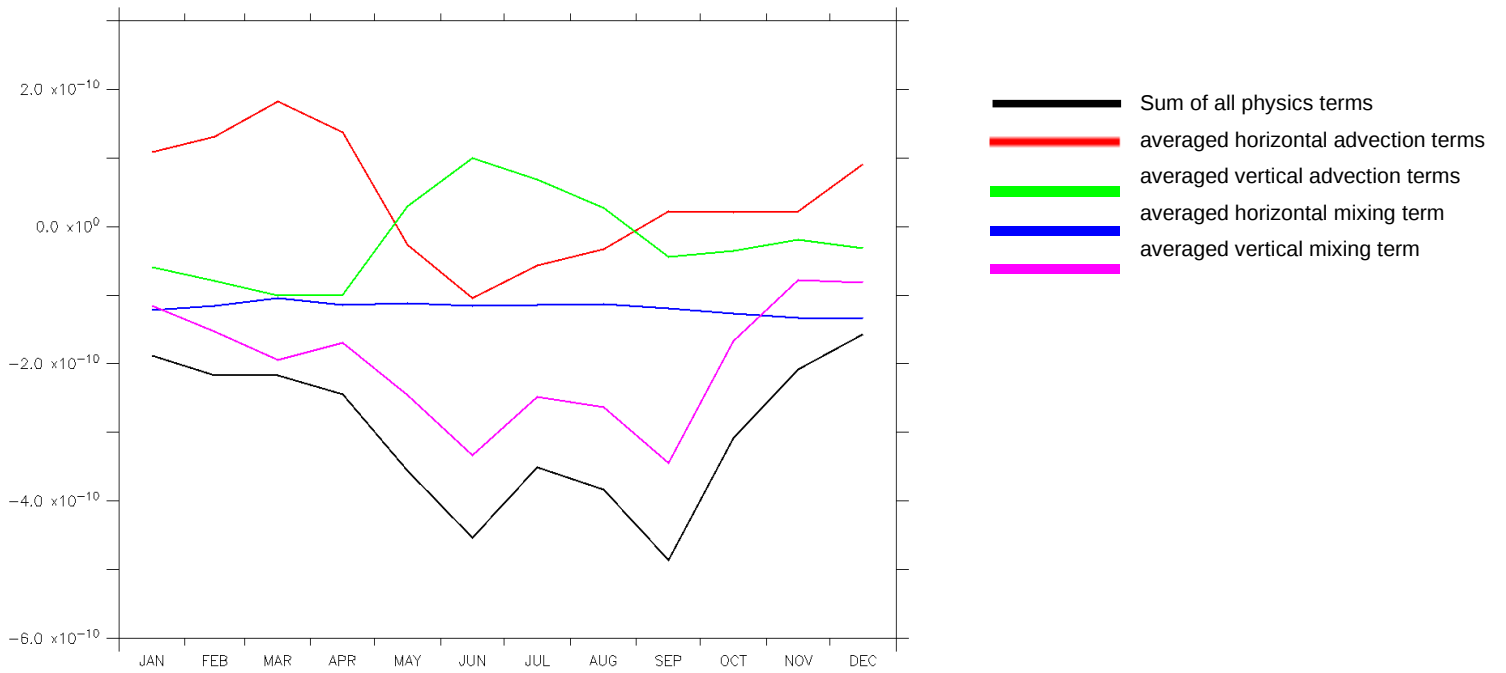

Figure Supp. 3

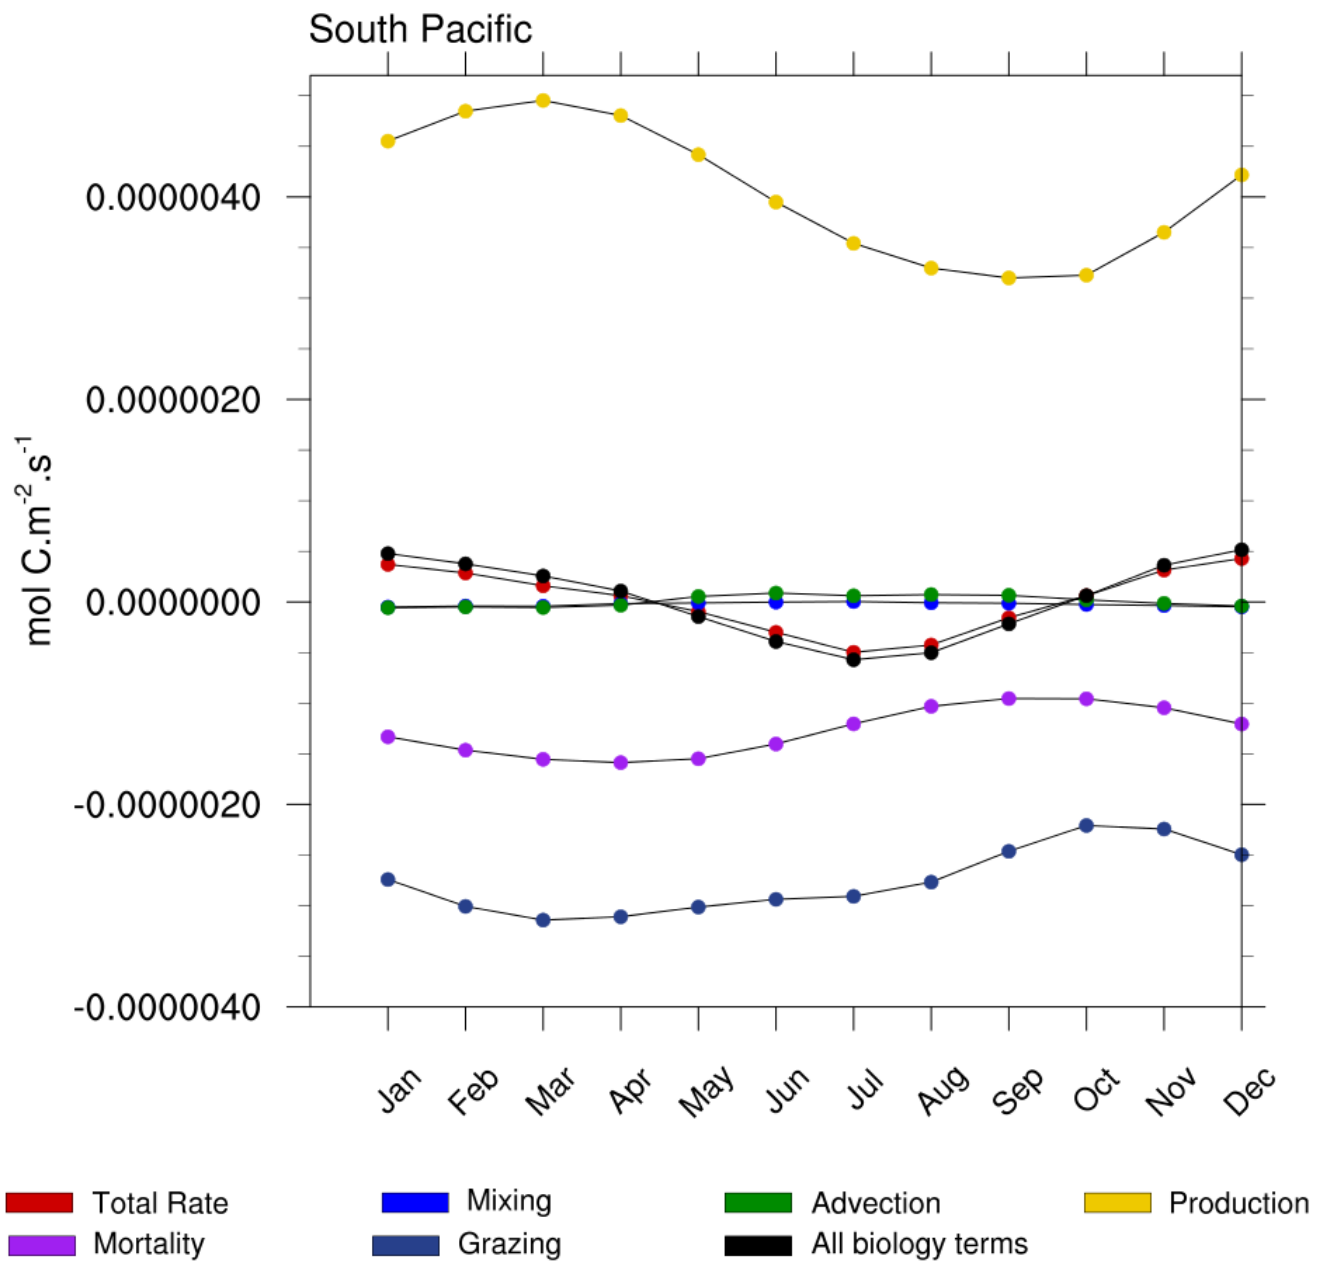

Figure Supp. 4
